# Supplementary material for: Digenic inheritance involving a muscle-specific protein kinase and the giant titin protein causes a skeletal muscle myopathy
Source: PubMed Central journal article supplement (PMC10937387; doi:10.1038/s41588-023-01651-0), 2024-03-01
Supplement: 41588_2023_1651_MOESM7_ESM.pdf [file 41588_2023_1651_MOESM7_ESM.pdf]

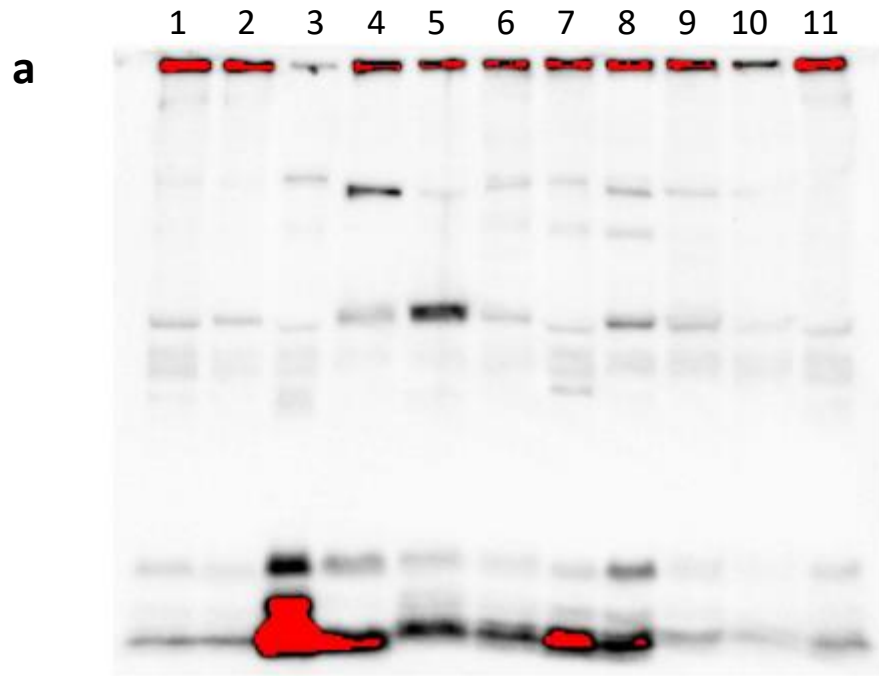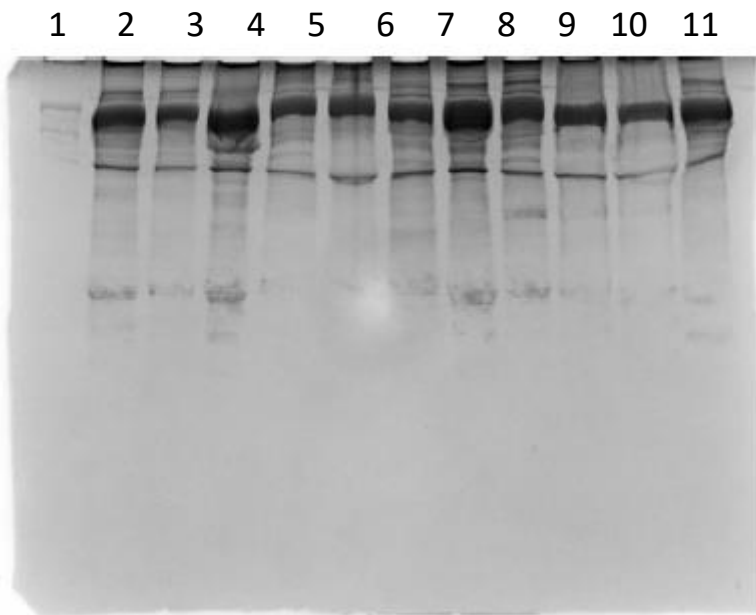

1: Control  
 2: Control  
 3: not included  
 4: LII:1  
 5: Control  
 6: YII:3  
 7: DI:1  
 8: DII:1  
 9: XII:3  
 10: XIII:1  
 11: control

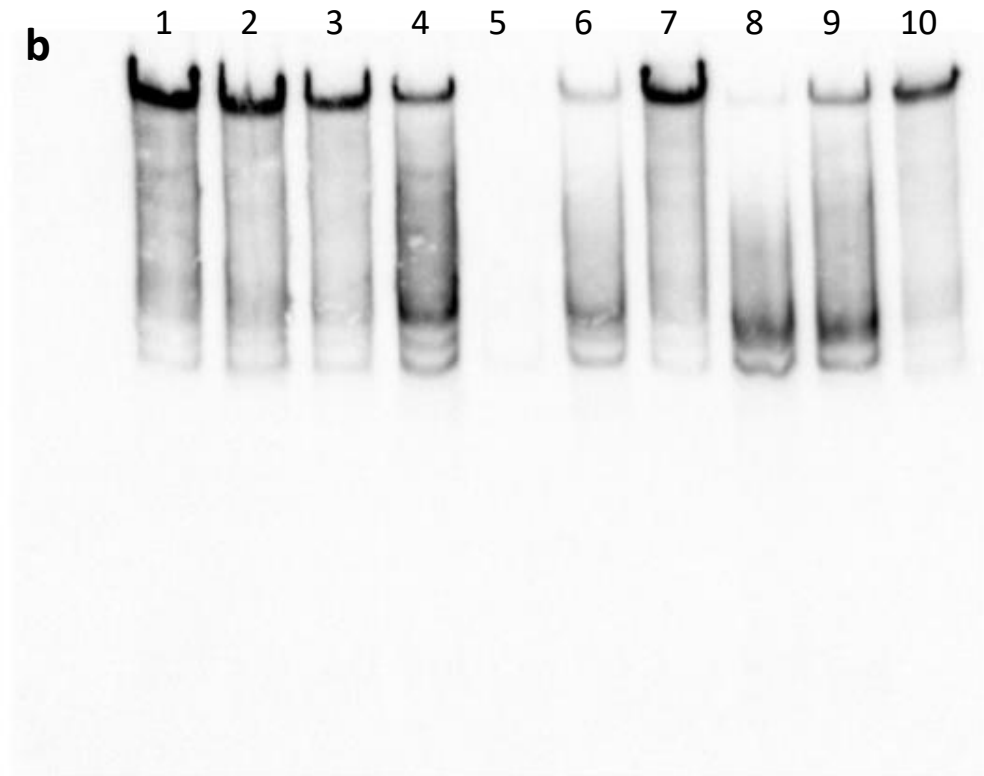

1: Control  
 2: Control  
 3: disease control  
 4: DI:1  
 5: not included  
 6: XIII:1  
 7: control  
 8: XII:3  
 9: YII:3  
 10: control

c

1 2 3 4 5 6 7 8 9 10 11

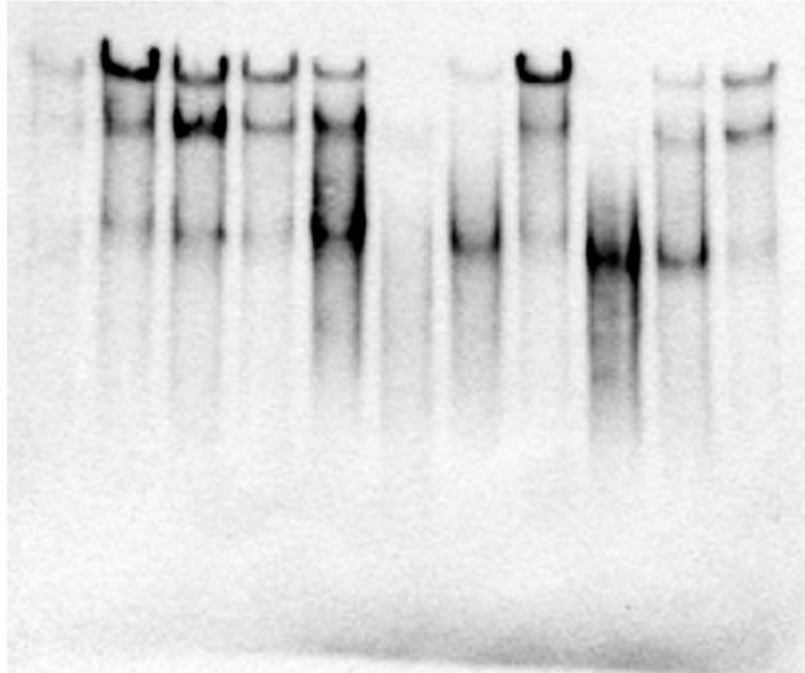

1: not included  
2: Control  
3: Control  
4: Disease control  
5: DI:1  
6: not included  
7: XIII:1  
8: control  
9: XII:3  
10: YII:3  
11: control

d

1 2 3 4 5 6 7 8 9 10 11 12 13 14

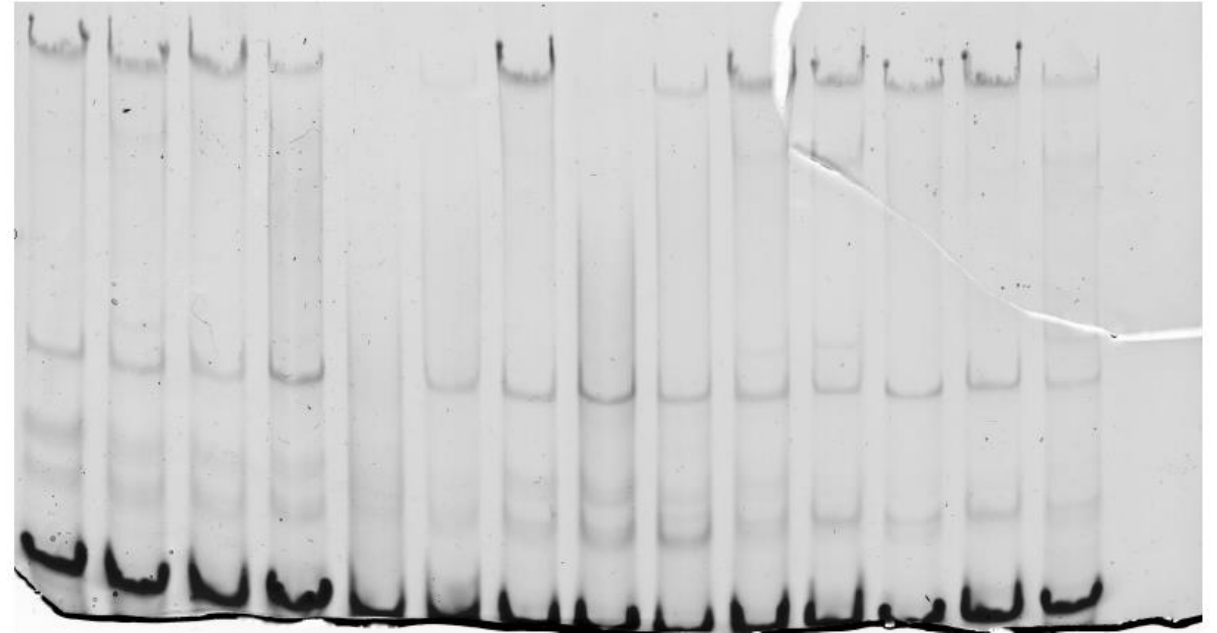

1: Control  
2: Control  
3: Disease control  
4: DI:1  
5: not included  
6: XIII:1  
7: control  
8: XII:3  
9: YII:3  
10: control  
11-14: not included
