# Supplementary material for: Digenic inheritance involving a muscle-specific protein kinase and the giant titin protein causes a skeletal muscle myopathy
Source: PubMed Central journal article supplement (PMC10937387; doi:10.1038/s41588-023-01651-0), 2024-03-01

**a**

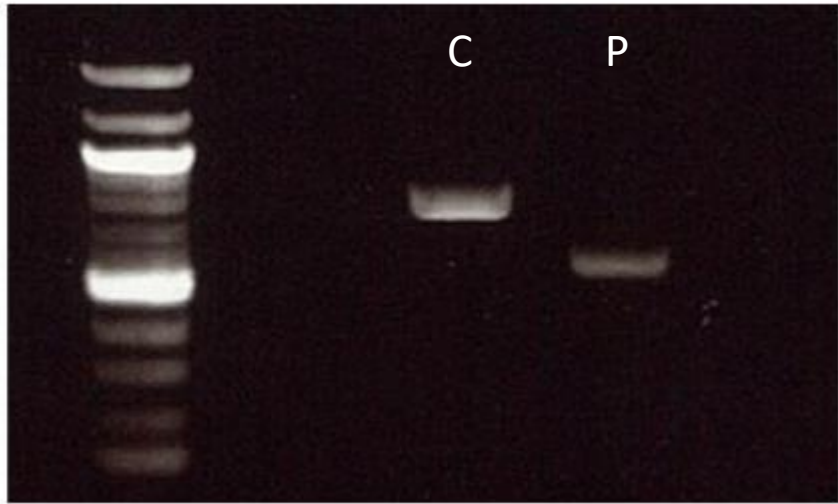

**b**

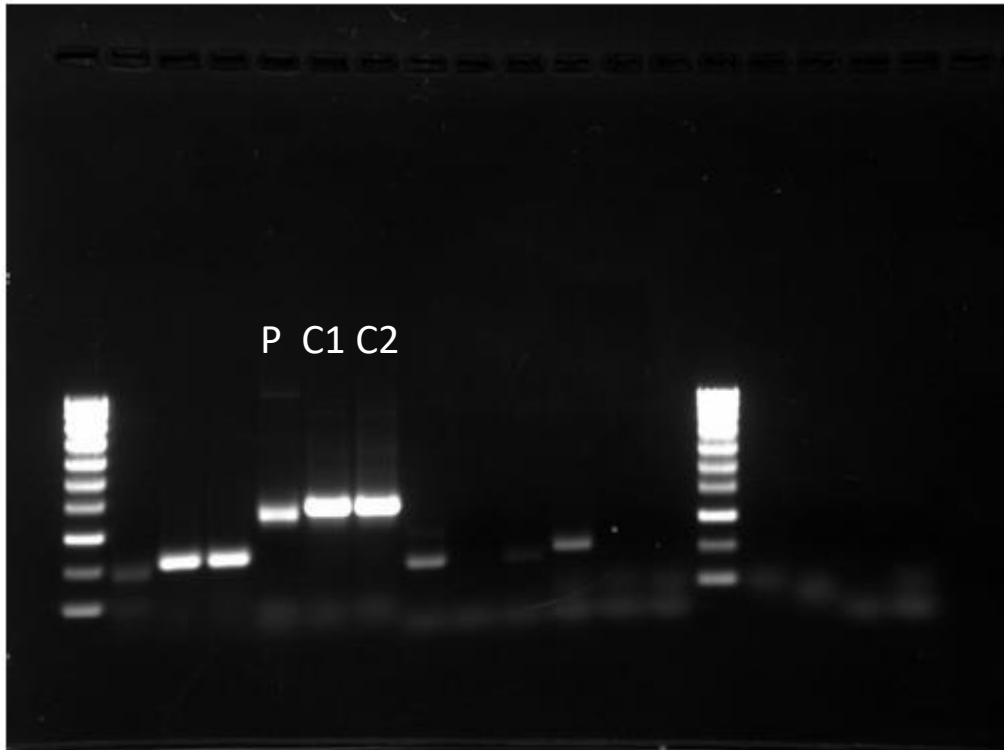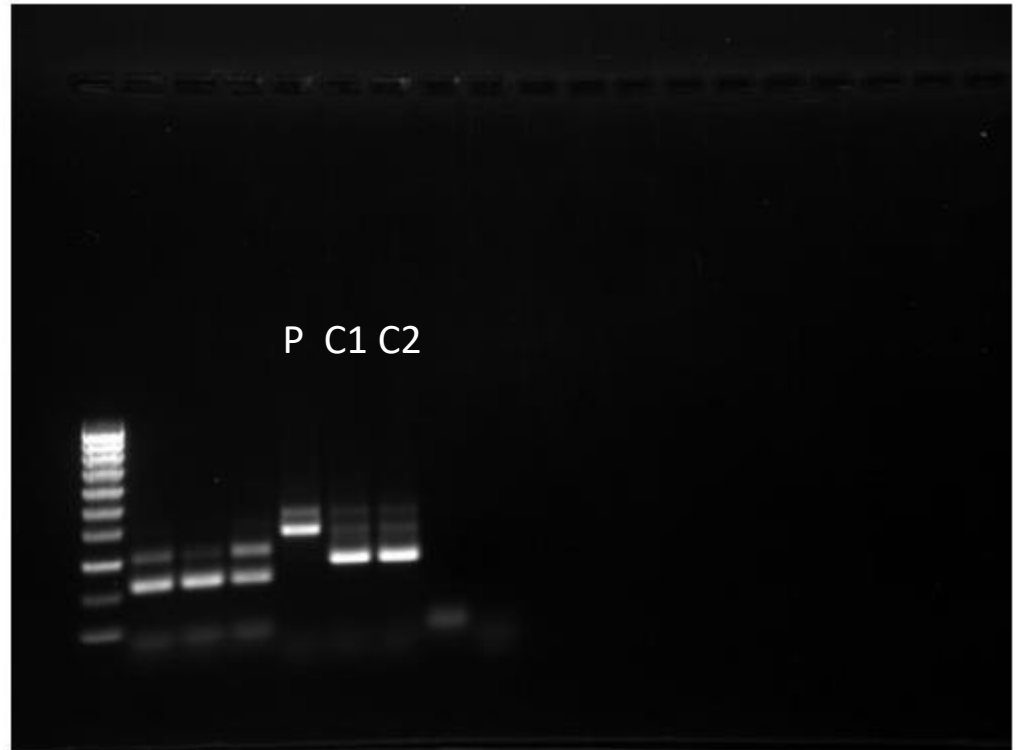

Supplement: 41588_2023_1651_MOESM9_ESM.pdf [file 41588_2023_1651_MOESM9_ESM.pdf]
